# Supplementary material for: Prevalence of undiagnosed dyspepsia associated factors, and its relationship with quality of life among undergraduate health professional students at Makerere University in Uganda
Source: Research Square preprint supplement (doi:10.21203/rs.3.rs-8112225/v1), 2025-12-08
Supplement: Supplementary file 1 [file b33394c2283d41a097959cda.docx]

**SUPPLEMENTARY TABLES**

Table 5. The Dietary habits of undergraduate health professional students at Makerere University.

| Variable | Frequency (n) | | Percentage (%) |
| --- | --- | --- | --- |
| Spicy food | |  |  |
| Never | | 63 | 16.7 |
| Some days | | 224 | 59.3 |
| Daily | | 91 | 24.0 |
| Hot foods | |  |  |
| Never/Some days | | 127 | 33.6 |
| Daily | | 251 | 66.4 |
| Deep fried foods | |  |  |
| Never | | 29 | 7.7 |
| Some days | | 228 | 60.3 |
| Daily | | 121 | 32.0 |
| Raw foods | |  |  |
| Never | | 107 | 28.7 |
| Some days | | 212 | 57.0 |
| Daily | | 53 | 14.3 |
| Dairy food | |  |  |
| Never | | 32 | 8.5 |
| Some days | | 221 | 58.5 |
| Daily | | 125 | 33.0 |
| Black tea | |  |  |
| Never | | 30 | 7.9 |
| Some days | | 114 | 30.2 |
| Daily | | 234 | 61.9 |
| Coffee | |  |  |
| Never | | 140 | 37.0 |
| Some days | | 144 | 38.1 |
| Daily | | 94 | 24.9 |
| Chocolate | |  |  |
| Never | | 120 | 31.8 |
| Some days | | 205 | 54.2 |
| Daily | | 53 | 14.0 |

Table 6. Lifestyle factors of undergraduate professional students at Makerere University.

| Variable | Frequency (n) | Percentage (%) |
| --- | --- | --- |
| Eating patterns |  |  |
| One meal a day | 77 | 20.4 |
| Two meals a day | 140 | 37.0 |
| Three meals a day | 161 | 42.6 |
| Alcohol drinking |  |  |
| No alcohol | 267 | 70.6 |
| Low risk drinker | 83 | 22.0 |
| Hazardous drinker/dependent drinker | 28 | 7.4 |
| Smoking |  |  |
| No | 376 | 99.5 |
| Yes | 2 | 0.5 |
| Trouble sleeping |  |  |
| Never | 220 | 58.2 |
| Some days | 109 | 28.8 |
| Always | 49 | 13.0 |
| Physical activity |  |  |
| Low physical activity | 96 | 25.4 |
| Moderate Activity | 201 | 53.2 |
| High activity | 81 | 21.4 |
| Amount spent on food per week (UgShs*) |  |  |
| Less than 35000 | 81 | 21.4 |
| 35000-100,000 | 287 | 75.9 |
| Greater than 100,000 | 10 | 2.7 |
| Sleep hours |  |  |
| Less than 7 hours | 292 | 77.3 |
| 7 hours and above | 86 | 22.7 |
| Energy drinks per week |  |  |
| No | 273 | 72.2 |
| 1-2 | 67 | 17.7 |
| 3-7 | 38 | 10.1 |
| UgShs* Ugandan Shillings |  |  |
|  |  |  |
|  |  |  |

**Table 7. Psychological and biological factors of 378 undergraduate professional students at Makerere University.**

| Variable | Frequency (n) | Percentage (%) |
| --- | --- | --- |
| Stress |  |  |
| Low stress | 46 | 12.2 |
| Moderate stress | 311 | 82.3 |
| High stress | 21 | 5.5 |
| Fatigue |  |  |
| No/Mild | 270 | 71.4 |
| Moderate | 95 | 25.1 |
| Severe | 13 | 3.5 |
| Body Mass Index |  |  |
| Underweight | 41 | 10.8 |
| Normal weight | 195 | 51.6 |
| Overweight | 90 | 23.8 |
| Obese | 52 | 13.8 |
|  |  |  |

Table 8. Bivariate analysis of social demographic factors associated with UD among 378 undergraduate health professional students at Makerere University.

| Variable | UD | |  | |  |
| --- | --- | --- | --- | --- | --- |
|  | Yes n (%) | No n (%) | cPR (95% CI) | | P value |
| **Age** |  |  |  | |  |
| 18-24 | 37(13.0) | 247(87.0) | Reference | |  |
| >24 | 14(14.9) | 80 (85.1) | 1.143 (0.664-1.968) | | 0.628 |
| **Sex** |  |  |  | |  |
| Male | 24(10.6) | 202(89.4) | Reference. | |  |
| Female | 27(17.8) | 125 (82.2) | 1.673 (1.031–2.714) | | 0.037 |
| **Academic program** |  |  |  | |  |
| MBChB | 36(14.8) | 207(85.2) | Reference | |  |
| BScN | 4(14.8) | 23 (85.2) | 1(0.398 -2.513) | | 0.967 |
| BPharm | 5(8.1) | 57 (91.9) | 0.544 (0.225-1.318) | | 0.177 |
| BDS | 6(13.0) | 40 (87.0) | 0.880 (0.390-1.986) | | 0.758 |
| **Year of Study** |  |  |  | |  |
| Year one | 8(11.6) | 61 (88.4) | Reference | |  |
| Year two | 6(9.8) | 55 (90.7) | 0.848 (0.322-2.237) | | 0.739 |
| Year three | 11(15.5) | 60(84.5) | 1.336 (0.583-3.064) | | 0.493 |
| Year four | 16(15.1) | 90 (84.9) | 1.302(0.604-2.806) | | 0.500 |
| Year five | 10(14.1) | 61 (85.9) | 1.214 (0.527-2.801) | | 0.647 |
| **Employment status** |  |  |  | |  |
| Unemployed | 42(13.2) | 276(86.8) | Reference | |  |
| Employed | 9(15.0) | 51(85.0) | 1.136 (0.607–2.126) | | 0.690 |
| **Sponsorship** |  |  |  | |  |
| Government | 34(13.0) | 227(87.0) | Reference | |  |
| Private | 17(14.5) | 100 (85.5) | 1.115(0.665-1.872) | | 0.679 |
| **Marital status** |  |  |  | |  |
| Single | 48(13.7) | 302(86.3) | Reference | |  |
| Married | 3(10.7) | 25 (89.3) | 0.781 (0.275–2.219) | | 0.642 |
| cPR: crude Prevalence Ratio. | %: Percent. | |  |

Table 9. Bivariate analysis of dietary factors associated with UD among 378 undergraduate health professional students at Makerere University.

|  | UD | |  | |  | |
| --- | --- | --- | --- | --- | --- | --- |
| Variable | Yes n(%) | No n(%) | cPR (95% CI) | | P value | |
| **Spicy food** |  |  |  | |  | |
| Never | 8(12.7) | 55(87.3) | Reference | |  | |
| Some days | 29(12.9) | 195(87.1) | 1.019 (0.513-2.025) | | 0.956 | |
| Daily | 14(15.4) | 77 (84.6) | 1.211 (0.569-2.577) | | 0.617 | |
| **Hot foods** |  |  |  | |  | |
| Never/Some days | 0(0.00) | 18(100) | Reference | |  | |
| Daily | 36(14.3) | 215(85.7) | 1.214 (0.715-2.062) | | 0.471 | |
| **Deep fried foods** |  |  |  | |  | |
| Never | 5(17.2) | 24 (82.8) | Reference | |  | |
| Some days | 27(11.8) | 201(88.2) | 0.687 (0.300 -1.569) | | 0.372 | |
| Daily | 19(15.7) | 102 (84.3) | 0.910 (0.388- 2.137) | | 0.829 | |
| **Raw foods** |  |  |  | |  | |
| Never | 17(15.9) | 90 (84.1) | Reference | |  | |
| Some days | 28(13.2) | 184 (86.8) | 0.831 (0.489-1.410) | | 0.492 | |
| Daily | 5(9.4) | 48 (90.6) | 0.594 (0.241 -1.463) | | 0.257 | |
| **Dairy foods** |  |  |  | |  | |
| Never | 4(12.5) | 28 (87.5) | Reference | |  | |
| Some days | 36 (16.3) | 185 (83.7) | 1.303 (0.517- 3.284) | | 0.574 | |
| Daily | 11(8.8) | 114 (91.2) | 0.704 (0.253- 1.959) | | 0.501 | |
| **Chocolate** |  |  |  | |  | |
| Never | 14(11.7) | 106 (88.3) | Reference | |  | |
| Some days | 31(15.1) | 174 (84.9) | 1.296 (0.742-2.263) | | 0.361 | |
| Daily | 6 (11.3) | 47 (88.7) | 0.970 (0.417- 2.265) | | 0.944 | |
| **Coffee** |  |  |  | |  | |
| Never | 14(10.0) | 126(90.0) | Reference | |  | |
| Some days | 24(16.7) | 120(83.3) | 1.667 (0.931-2.985) | | 0.086 | |
| Daily | 13(13.8) | 81(86.2) | 1.383 (0.711- 2.692) | | 0.339 | |
| **Black tea** |  |  |  | |  | |
| Never | 7 (23.3) | 23 (76.7) | Reference | |  | |
| Some days | 17 (14.9) | 97 (85.1) | 0.639 (0.306 - 1.335) | | 0.233 | |
| Daily | 27(11.5) | 207(88.5) | 0.494 (0.246 -0.993) | | 0.048 | |
|  | |  |  |  | |

Table 10. Bivariate analysis of lifestyle factors associated with UD among 378 undergraduate health professional students at Makerere University.

| Variable | UD | |  |  |
| --- | --- | --- | --- | --- |
|  | Yes n(%) | No n(%) | cPR(95% CI) | P value |
| **Eating patterns** |  |  |  |  |
| One meal a day | 7(9.1) | 70 (90.9) | Reference |  |
| Two meals a day | 28(20.0) | 112(80.0) | 2.200(1.054-4.593) | 0.036 |
| Three meals a day | 16(9.9) | 145(90.1) | 1.093 (0.490-2.437) | 0.827 |
| **Alcohol drinking** |  |  |  |  |
| No alcohol | 32(12.0) | 235(88.0) | Reference |  |
| Low risk drinker | 17(20.5) | 66(79.5) | 1.708 (1.028-2.839) | 0.039 |
| Hazardous /dependent drinker | 2(7.1) | 26(92.9) | 0.596 (0.163-2.179) | 0.433 |
| **Amount spent on food per week (UgShs)** |  |  |  |  |
| Less than 35000 | 9(11.1) | 72 (88.9) | Reference |  |
| 35000-100,000 | 41(14.3) | 246 (85.7) | 1.285 (0.675-2.448) | 0.443 |
| Greater than 100,000 | 1(10.0) | 9 (90.0) | 0.900 (1.133-6.103) | 0.914 |
| **Trouble sleeping in most days** |  |  |  |  |
| Never | 29(13.2) | 191(86.8) | Reference |  |
| Some days | 15 (13.8) | 94 (86.2) | 1.040 (0.603-1.806) | 0.877 |
| Always | 7(14.3) | 42 (85.7) | 1.080 (0.531-2.21) | 0.825 |
| **Physical activity** |  |  |  |  |
| Low physical activity | 16(16.7) | 80 (83.3) | Reference |  |
| Moderate activity | 30(14.9) | 171 (85.1) | 0.895 (0.531-1.509) | 0.678 |
| High activity | 5(6.2) | 76 (93.8) | 0.370 (0.147-0.931) | 0.035 |
| **Sleep hours** |  |  |  |  |
| Less than 7 hours | 34(11.6) | 258 (88.4) | Reference |  |
| 7 hours and above | 17(19.8) | 69 (80.2) | 1.698 (1.021-2.822) | 0.041 |
| **Use of NSAIDs** |  |  |  |  |
| No | 39 (12.7) | 268 (87.3) | Reference |  |
| Yes | 12(16.9) | 59 (83.1) | 1.330 (0.756-2.342) | 0.321 |
| **Energy drinks per week** |  |  |  |  |
| No | 35 (12.8) | 238 (87.2) | Reference |  |
| 1-2 | 11 (16.4) | 56 (83.6) | 1.26(0.726–2.212) | 0.437 |
| 3-7 | 5 (13.2) | 33(86.8) | 0.93 (0.325–2.692) | 0.954 |
| cPR: crude Prevalence Ratio. | | %: Percent | CI: Confidence Interval. | |

Table 11. Bivariate analysis of psychological and biological factors associated with UD among 378 undergraduate health professional students at Makerere University.

| Variable | UD | | |  | Variable |
| --- | --- | --- | --- | --- | --- |
|  | Yes n(%) | | No n(%) | cPR(95% CI) |  |
| **Stress** | |  |  |  |  |
| Low stress | | 5(10.9) | 41 (89.1) | Reference |  |
| Moderate | | 42(13.5) | 269 (86.5) | 1.242 (0.541 -2.853) | 0.608 |
| High stress | | 4(19.1) | 17 (80.9) | 1.752 (0.569- 5.398) | 0.327 |
| **Fatigue** | |  |  |  |  |
| No/Mild | | 28(10.4) | 242 (89.6) | Reference |  |
| Moderate | | 21(22.1) | 74 (77.9) | 2.131 (1.308-3.473) | 0.002 |
| Severe | | 2(15.4) | 11 (84.6) | 1.483 (0.416-5.287) | 0.542 |
| **Body Mass Index** | |  |  |  |  |
| Normal weight | | 20(10.3) | 175 (89.7) | Reference |  |
| Underweight | | 7(17.1) | 34(82.9) | 1.665 (0.783–3.538) | 0.185 |
| Overweight | | 15(16.7) | 75 (83.3) | 1.625 (0.898–2.939) | 0.108 |
| Obese | | 9(17.3) | 43 (82.7) | 1.688 (0.845–3.370) | 0.138 |

**Appendix 1. Data collection tool**

**Section 1: Socio-demographic Information**

1. Age: _______

2. Sex:

1. Male
2. Female

3. Course

1. Bachelor of medicine and surgery
2. Bachelor of Science in Nursing
3. Bachelor of Pharmacy
4. Bachelor of Dental Surgery

4. Year of study

1. Year one
2. Year two
3. Year three
4. Year four
5. Year five

5. Marital status

1. Married
2. Single
3. Other (please specify) ______

6.. Employment Status:

1. Employed
2. Unemployed
3. Retired
4. Other (please specify) ______

7. Who sponsors your education?

1. Government
2. Private
3. Other……………………….

8. How much do you spend on food per week?

……………………………………………

9a). Weight ……………………………………….

9b Height ………………………………………….

**Prevalence of undiagnosed dyspepsia among undergraduate health professional students at Makerere University**

**10. Have you experienced any of the following symptoms? (Tick all that apply)**

1. Postprandial fullness (feeling unusually full after a normal-sized meal)
2. Early satiation (feeling full after eating a small amount of food)
3. Epigastric pain (pain or discomfort in the upper middle part of your abdomen)
4. Epigastric burning (a burning sensation in the upper middle part of your abdomen**)**

**11. When did these symptoms start?**

1. One month to three months back
2. Three to five months back
3. Six months back
4. Other, specify ………………………….

**12. How often have you experienced those symptoms?**

1. Less than once a week
2. 1-2 times a week
3. 3-4 times a week
4. More than 4 times a week
5. D. OTHER, Specify …………………………………….

13. **About answers in question 7, how long have you been experiencing that?**

A. Less than a month

B. One month to two months

C. Three months

D. OTHER, Specify …………………………………….

**14. Have you done any diagnostic tests in the last six months to investigate your symptoms?**

1. Yes
2. No

15**. If any investigation was done, what did it reveal?**

**………………………………………………….**

**Factors associated with undiagnosed dyspepsia among health professional students.**

**16. Tick where applies**

|  |  | **NEVER** | **ALMOST NEVER** | **SOMETIMES** | **FAIRLY OFTEN** | **VERY OFTEN** |
| --- | --- | --- | --- | --- | --- | --- |
| 1 | In the last month, how often have you been upset because of something that happened unexpectedly? |  |  |  |  |  |
| 2 | In the last month, how often have you felt that you were unable to control the important things in your life? |  |  |  |  |  |
| 3 | In the last month, how often have you felt nervous and stressed? |  |  |  |  |  |
| 4 | In the last month, how often have you felt confident about your ability to handle your personal problems? |  |  |  |  |  |
| 5 | . In the last month, how often have you felt that things were going your way? |  |  |  |  |  |
| 6 | In the last month, how often have you found that you could not cope with all the things that you had to do? |  |  |  |  |  |
| 7 | In the last month, how often have you been able to control irritations in your life? |  |  |  |  |  |
| 8 | . In the last month, how often have you felt that you were on top of things? |  |  |  |  |  |
| 9 | . In the last month, how often have you been angered because of things that happened that were outside of your control? |  |  |  |  |  |
| 10 | In the last month, how often have you felt difficulties were piling up so high that you could not overcome them? |  |  |  |  |  |

**17. Circle where applies**

| 1. How often do you have a drink containing alcohol?  (0) Never [Skip to Qs 9-10]  (1) Monthly or less  (2) 2 to 4 times a month  (3) 2 to 3 times a week  (4) 4 or more times a week | 6. How often during the last year have you needed a first drink in the morning to get yourself going after a heavy drinking session?  (0) Never  (1) Less than monthly  (2) Monthly  (3) Weekly  (4) Daily or almost daily |
| --- | --- |
| 2.How many drinks containing alcohol do you have on a typical day when you are drinking?  (0) 1 or 2  (1) 3 or 4  (2) 5 or 6  (3) 7, 8, or 9  (4) 10 or more | 7. How often during the last year have you had a feeling of guilt or remorse after drinking?  (0) Never  (1) Less than monthly  (2) Monthly  (3) Weekly  (4) Daily or almost daily |
| 3. How often do you have six or more drinks on one occasion?  (0) Never  (1) Less than monthly  (2) Monthly  (3) Weekly  (4) Daily or almost daily Skip to Questions 9 and 10 if Total Score for Questions 2 and 3 = 0 | 8. How often during the last year have you been unable to remember what happened the night before because you had been drinking?  (0) Never  (1) Less than monthly  (2) Monthly  (3) Weekly  (4) Daily or almost daily |
| 4. How often during the last year have you found that you were not able to stop drinking once you had started?  (0) Never  (1) Less than monthly  (2) Monthly  (3) Weekly  (4) Daily or almost daily | 9.Have you or someone else been injured as a result of your drinking?  (0) No  (2) Yes, but not in the last year  (4) Yes, during the last yea |
| 5.How often during the last year have you failed to do what was normally expected from you because of drinking?  (0) Never  (1) Less than monthly  (2) Monthly  (3) Weekly  (4) Daily or almost daily | 10.Has a relative or friend or a doctor or another health worker been concerned about your drinking or suggested you cut down?  (0) No  (2) Yes, but not in the last year  (4) Yes, during the last year |

**18. Tick where applies**

|  | Never | Sometimes | Regularly | Often | Always |
| --- | --- | --- | --- | --- | --- |
| I am bothered by fatigue |  |  |  |  |  |
| I get tired very quickly |  |  |  |  |  |
| I don’t do much during day |  |  |  |  |  |
| I have enough energy for everyday life |  |  |  |  |  |
| Physically, I feel exhausted |  |  |  |  |  |
| I have problems starting things |  |  |  |  |  |
| I have no desire to do anything |  |  |  |  |  |
| Mentally, I feel exhausted |  |  |  |  |  |
| When I am doing something, I can concentrate quite well. |  |  |  |  |  |

19. Do you take energizing drinks?

1. Yes
2. No

20. If yes, how often per week?

……………………………………………………………

21. Do you normally drink coffee?

1. Yes
2. No

22. If yes, how often per week?

…..……………………………………………………………

23.Do you often use NSAIDs?

1. Yes
2. No

24. Do you smoke cigarettes or use tobacco products?

1. Yes
2. No

25. If yes, how many cigarettes do you smoke per day on average?

1. Less than 5
2. 5-10
3. 10-20
4. More than 20

26. How often do you consume the following meals

|  | Never | Somedays | Daily |
| --- | --- | --- | --- |
| Breakfast |  |  |  |
| Lunch |  |  |  |
| Supper. |  |  |  |

27. How often do you consume the following foods in the previous 30 days?

|  | Never | Some days | Daily |
| --- | --- | --- | --- |
| Spicy foods |  |  |  |
| Hot foods |  |  |  |
| Deep fried foods |  |  |  |
| Raw foods eg salads, fruits |  |  |  |
| Dairy foods |  |  |  |
| Black tea |  |  |  |
| Coffee |  |  |  |
| Chocolate |  |  |  |

28. On average, how many hours of sleep do you get each night?

1. Less than 4 hours
2. 4-6 hours
3. 6-8 hours
4. More than 8 hours

29. Do you have trouble falling asleep or staying asleep?

1. Never
2. Occasionally
3. Frequently
4. Always

30a). During the last 7 days, how many days did you do vigorous physical activities like heavy lifting, digging, aerobics, or fast bicycling?

…………………………….

b) How much time did you usually spend doing vigorous physical activities on one of those days?

Number of days …………………….

Number of hours/minutes……………………

c)During the last 7 days, how many days did you do moderate physical activities like carrying light loads, bicycling at a regular pace, or doubles tennis?

……………………………………………

d.) How much time did you usually spend doing moderate physical activities on one of those days?

Number of days …………………….

Number of hours/minutes……………………

e) During the last 7 days, how many days did you walk for at least 10 minutes at a time?

………………………………………

f) How much time did you usually spend walking on one of those days?

Number of hours …………………….

Number of minutes……………………

**31. The relationship between quality of life and undiagnosed dyspepsia**.

**General questions**

i) How would you rate your quality of life?

1. Very poor
2. Poor
3. Neither poor nor good
4. Very good

ii)How satisfied are you with your health?

1. Very dissatisfied
2. Dissatisfied
3. Neither dissatisfied nor satisfied
4. Satisfied
5. Very satisfied

**Physical domain**

iii)To what extent do you feel that physical pain prevents you from doing what you are supposed to do?

1. Not at all
2. A little
3. Moderate amount
4. Very much
5. Extreme amount

iv)How much do you need medical treatment to function in your daily life?

1. Not at all
2. A little
3. Moderate amount
4. Very much
5. Extreme amount

v)Do you have enough energy for everyday life?

1. Not at all
2. A little
3. Moderate amount
4. Very much
5. Extreme amount

vi)How well are able to get around?

1. Very poor
2. Poor
3. Neither poor nor good
4. Good
5. Very good

|  | Very dissatisfied | Dissatisfied | Neither satisfied nor dissatisfied | Satisfied | Very satisfied |
| --- | --- | --- | --- | --- | --- |
| vii) How satisfied are you with your sleep? |  |  |  |  |  |
| viii) How satisfied are you with your ability to perform daily living activities? |  |  |  |  |  |
| ix) How satisfied are you with your work capacity? |  |  |  |  |  |

**Psychological domain**

x)To what extent do you feel your life to be meaningful?

1. Not at all
2. A little
3. Moderately
4. Mostly
5. Completely

xi)How well are you able to concentrate?

1. Very poor
2. Poor
3. Neither poor nor good
4. Good
5. Very good

xii)Are you able to accept your bodily appearance?

A. Very dissatisfied

B. Dissatisfied

C. Neither dissatisfied nor satisfied

D. Satisfied

E. Very satisfied

xiii) How often do you have negative feelings such as blue mood, despair, anxiety, depression?

1. Never
2. Seldom
3. Quite often
4. Very often
5. Always

xiv) How satisfied are you with yourself?

1. Very dissatisfied
2. Dissatisfied
3. Neither dissatisfied nor satisfied
4. Satisfied
5. Very satisfied

xv)How much do you enjoy life?

A. Not at all

B. A little

C. Moderately

D. Mostly

E. Completely

**Social relationship.**

|  | Very dissatisfied | Dissatisfied | Neither satisfied nor dissatisfied | Satisfied | Very satisfied |
| --- | --- | --- | --- | --- | --- |
| xvi)How satisfied are you with your personal relationships? |  |  |  |  |  |
| xvii)How satisfied are you with your sex life? |  |  |  |  |  |
| xviii)How satisfied are you with the support you get from your friends? |  |  |  |  |  |

**Environmental domain.**

xix)How safe do you feel in your daily life?

1. Not at all
2. A little
3. Moderately
4. Mostly
5. Completely

xx)How healthy is your physical environment (pollution, noise, climate, etc.)

1. Very unhealthy
2. Healthy
3. Neither healthy nor unhealthy
4. Healthy
5. Very healthy

xxi) How available is the information you need in your day-to-day life?

1. Not at all available
2. A little available
3. Moderately available
4. Mostly available
5. Completely available

xxii) Do you have you enough money to meet your needs?

1. Not at all
2. A little
3. Moderately
4. Mostly.
5. Completely.

xxiii) To what extent do you have the opportunity for leisure activities?

1. Not at all
2. A little
3. Moderately
4. Very much
5. Completely

|  | Very dissatisfied | Dissatisfied | Neither satisfied nor dissatisfied | Satisfied | Very satisfied |
| --- | --- | --- | --- | --- | --- |
| xxiv)How satisfied are you with the conditions of your living place? |  |  |  |  |  |
| xxv)How satisfied are you with your access to health services? |  |  |  |  |  |
| xxvi)How satisfied are you with your transport? |  |  |  |  |  |
