# Supplementary material for: Prevalence of undiagnosed dyspepsia associated factors, and its relationship with quality of life among undergraduate health professional students at Makerere University in Uganda
Source: Research Square preprint supplement (doi:10.21203/rs.3.rs-8112225/v1), 2025-12-08
Supplement: Supplementary file 2 [file d11423aa9078fe4f05e38895.docx]

**SUPPLEMENTARY TABLES**

Table 1. The Dietary habits of undergraduate health professional students at Makerere University.

| Variable | Frequency (n) | | Percentage (%) |
| --- | --- | --- | --- |
| Spicy food | |  |  |
| Never | | 63 | 16.7 |
| Some days | | 224 | 59.3 |
| Daily | | 91 | 24.0 |
| Hot foods | |  |  |
| Never/Some days | | 127 | 33.6 |
| Daily | | 251 | 66.4 |
| Deep fried foods | |  |  |
| Never | | 29 | 7.7 |
| Some days | | 228 | 60.3 |
| Daily | | 121 | 32.0 |
| Raw foods | |  |  |
| Never | | 107 | 28.7 |
| Some days | | 212 | 57.0 |
| Daily | | 53 | 14.3 |
| Dairy food | |  |  |
| Never | | 32 | 8.5 |
| Some days | | 221 | 58.5 |
| Daily | | 125 | 33.0 |
| Black tea | |  |  |
| Never | | 30 | 7.9 |
| Some days | | 114 | 30.2 |
| Daily | | 234 | 61.9 |
| Coffee | |  |  |
| Never | | 140 | 37.0 |
| Some days | | 144 | 38.1 |
| Daily | | 94 | 24.9 |
| Chocolate | |  |  |
| Never | | 120 | 31.8 |
| Some days | | 205 | 54.2 |
| Daily | | 53 | 14.0 |

Table 2. Lifestyle factors of undergraduate professional students at Makerere University.

| Variable | Frequency (n) | Percentage (%) |
| --- | --- | --- |
| Eating patterns |  |  |
| One meal a day | 77 | 20.4 |
| Two meals a day | 140 | 37.0 |
| Three meals a day | 161 | 42.6 |
| Alcohol drinking |  |  |
| No alcohol | 267 | 70.6 |
| Low risk drinker | 83 | 22.0 |
| Hazardous drinker/dependent drinker | 28 | 7.4 |
| Smoking |  |  |
| No | 376 | 99.5 |
| Yes | 2 | 0.5 |
| Trouble sleeping |  |  |
| Never | 220 | 58.2 |
| Some days | 109 | 28.8 |
| Always | 49 | 13.0 |
| Physical activity |  |  |
| Low physical activity | 96 | 25.4 |
| Moderate Activity | 201 | 53.2 |
| High activity | 81 | 21.4 |
| Amount spent on food per week (UgShs*) |  |  |
| Less than 35000 | 81 | 21.4 |
| 35000-100,000 | 287 | 75.9 |
| Greater than 100,000 | 10 | 2.7 |
| Sleep hours |  |  |
| Less than 7 hours | 292 | 77.3 |
| 7 hours and above | 86 | 22.7 |
| Energy drinks per week |  |  |
| No | 273 | 72.2 |
| 1-2 | 67 | 17.7 |
| 3-7 | 38 | 10.1 |
| UgShs* Ugandan Shillings |  |  |
|  |  |  |
|  |  |  |

**Table 3. Psychological and biological factors of 378 undergraduate professional students at Makerere University.**

| Variable | Frequency (n) | Percentage (%) |
| --- | --- | --- |
| Stress |  |  |
| Low stress | 46 | 12.2 |
| Moderate stress | 311 | 82.3 |
| High stress | 21 | 5.5 |
| Fatigue |  |  |
| No/Mild | 270 | 71.4 |
| Moderate | 95 | 25.1 |
| Severe | 13 | 3.5 |
| Body Mass Index |  |  |
| Underweight | 41 | 10.8 |
| Normal weight | 195 | 51.6 |
| Overweight | 90 | 23.8 |
| Obese | 52 | 13.8 |
|  |  |  |

Table 4. Bivariate analysis of social demographic factors associated with UD among 378 undergraduate health professional students at Makerere University.

| Variable | UD | |  | |  |
| --- | --- | --- | --- | --- | --- |
|  | Yes n (%) | No n (%) | cPR (95% CI) | | P value |
| **Age** |  |  |  | |  |
| 18-24 | 37(13.0) | 247(87.0) | Reference | |  |
| >24 | 14(14.9) | 80 (85.1) | 1.143 (0.664-1.968) | | 0.628 |
| **Sex** |  |  |  | |  |
| Male | 24(10.6) | 202(89.4) | Reference. | |  |
| Female | 27(17.8) | 125 (82.2) | 1.673 (1.031–2.714) | | 0.037 |
| **Academic program** |  |  |  | |  |
| MBChB | 36(14.8) | 207(85.2) | Reference | |  |
| BScN | 4(14.8) | 23 (85.2) | 1(0.398 -2.513) | | 0.967 |
| BPharm | 5(8.1) | 57 (91.9) | 0.544 (0.225-1.318) | | 0.177 |
| BDS | 6(13.0) | 40 (87.0) | 0.880 (0.390-1.986) | | 0.758 |
| **Year of Study** |  |  |  | |  |
| Year one | 8(11.6) | 61 (88.4) | Reference | |  |
| Year two | 6(9.8) | 55 (90.7) | 0.848 (0.322-2.237) | | 0.739 |
| Year three | 11(15.5) | 60(84.5) | 1.336 (0.583-3.064) | | 0.493 |
| Year four | 16(15.1) | 90 (84.9) | 1.302(0.604-2.806) | | 0.500 |
| Year five | 10(14.1) | 61 (85.9) | 1.214 (0.527-2.801) | | 0.647 |
| **Employment status** |  |  |  | |  |
| Unemployed | 42(13.2) | 276(86.8) | Reference | |  |
| Employed | 9(15.0) | 51(85.0) | 1.136 (0.607–2.126) | | 0.690 |
| **Sponsorship** |  |  |  | |  |
| Government | 34(13.0) | 227(87.0) | Reference | |  |
| Private | 17(14.5) | 100 (85.5) | 1.115(0.665-1.872) | | 0.679 |
| **Marital status** |  |  |  | |  |
| Single | 48(13.7) | 302(86.3) | Reference | |  |
| Married | 3(10.7) | 25 (89.3) | 0.781 (0.275–2.219) | | 0.642 |
| cPR: crude Prevalence Ratio. | %: Percent. | |  |

Table 5. Bivariate analysis of dietary factors associated with UD among 378 undergraduate health professional students at Makerere University.

|  | UD | |  | |  | |
| --- | --- | --- | --- | --- | --- | --- |
| Variable | Yes n(%) | No n(%) | cPR (95% CI) | | P value | |
| **Spicy food** |  |  |  | |  | |
| Never | 8(12.7) | 55(87.3) | Reference | |  | |
| Some days | 29(12.9) | 195(87.1) | 1.019 (0.513-2.025) | | 0.956 | |
| Daily | 14(15.4) | 77 (84.6) | 1.211 (0.569-2.577) | | 0.617 | |
| **Hot foods** |  |  |  | |  | |
| Never/Some days | 0(0.00) | 18(100) | Reference | |  | |
| Daily | 36(14.3) | 215(85.7) | 1.214 (0.715-2.062) | | 0.471 | |
| **Deep fried foods** |  |  |  | |  | |
| Never | 5(17.2) | 24 (82.8) | Reference | |  | |
| Some days | 27(11.8) | 201(88.2) | 0.687 (0.300 -1.569) | | 0.372 | |
| Daily | 19(15.7) | 102 (84.3) | 0.910 (0.388- 2.137) | | 0.829 | |
| **Raw foods** |  |  |  | |  | |
| Never | 17(15.9) | 90 (84.1) | Reference | |  | |
| Some days | 28(13.2) | 184 (86.8) | 0.831 (0.489-1.410) | | 0.492 | |
| Daily | 5(9.4) | 48 (90.6) | 0.594 (0.241 -1.463) | | 0.257 | |
| **Dairy foods** |  |  |  | |  | |
| Never | 4(12.5) | 28 (87.5) | Reference | |  | |
| Some days | 36 (16.3) | 185 (83.7) | 1.303 (0.517- 3.284) | | 0.574 | |
| Daily | 11(8.8) | 114 (91.2) | 0.704 (0.253- 1.959) | | 0.501 | |
| **Chocolate** |  |  |  | |  | |
| Never | 14(11.7) | 106 (88.3) | Reference | |  | |
| Some days | 31(15.1) | 174 (84.9) | 1.296 (0.742-2.263) | | 0.361 | |
| Daily | 6 (11.3) | 47 (88.7) | 0.970 (0.417- 2.265) | | 0.944 | |
| **Coffee** |  |  |  | |  | |
| Never | 14(10.0) | 126(90.0) | Reference | |  | |
| Some days | 24(16.7) | 120(83.3) | 1.667 (0.931-2.985) | | 0.086 | |
| Daily | 13(13.8) | 81(86.2) | 1.383 (0.711- 2.692) | | 0.339 | |
| **Black tea** |  |  |  | |  | |
| Never | 7 (23.3) | 23 (76.7) | Reference | |  | |
| Some days | 17 (14.9) | 97 (85.1) | 0.639 (0.306 - 1.335) | | 0.233 | |
| Daily | 27(11.5) | 207(88.5) | 0.494 (0.246 -0.993) | | 0.048 | |
|  | |  |  |  | |

Table 6. Bivariate analysis of dietary factors associated with UD among 378 undergraduate health professional students at Makerere University.

| Variable | UD | |  |  |
| --- | --- | --- | --- | --- |
|  | Yes n(%) | No n(%) | cPR(95% CI) | P value |
| **Eating patterns** |  |  |  |  |
| One meal a day | 7(9.1) | 70 (90.9) | Reference |  |
| Two meals a day | 28(20.0) | 112(80.0) | 2.200(1.054-4.593) | 0.036 |
| Three meals a day | 16(9.9) | 145(90.1) | 1.093 (0.490-2.437) | 0.827 |
| **Alcohol drinking** |  |  |  |  |
| No alcohol | 32(12.0) | 235(88.0) | Reference |  |
| Low risk drinker | 17(20.5) | 66(79.5) | 1.708 (1.028-2.839) | 0.039 |
| Hazardous /dependent drinker | 2(7.1) | 26(92.9) | 0.596 (0.163-2.179) | 0.433 |
| **Amount spent on food per week (UgShs)** |  |  |  |  |
| Less than 35000 | 9(11.1) | 72 (88.9) | Reference |  |
| 35000-100,000 | 41(14.3) | 246 (85.7) | 1.285 (0.675-2.448) | 0.443 |
| Greater than 100,000 | 1(10.0) | 9 (90.0) | 0.900 (1.133-6.103) | 0.914 |
| **Trouble sleeping in most days** |  |  |  |  |
| Never | 29(13.2) | 191(86.8) | Reference |  |
| Some days | 15 (13.8) | 94 (86.2) | 1.040 (0.603-1.806) | 0.877 |
| Always | 7(14.3) | 42 (85.7) | 1.080 (0.531-2.21) | 0.825 |
| **Physical activity** |  |  |  |  |
| Low physical activity | 16(16.7) | 80 (83.3) | Reference |  |
| Moderate activity | 30(14.9) | 171 (85.1) | 0.895 (0.531-1.509) | 0.678 |
| High activity | 5(6.2) | 76 (93.8) | 0.370 (0.147-0.931) | 0.035 |
| **Sleep hours** |  |  |  |  |
| Less than 7 hours | 34(11.6) | 258 (88.4) | Reference |  |
| 7 hours and above | 17(19.8) | 69 (80.2) | 1.698 (1.021-2.822) | 0.041 |
| **Use of NSAIDs** |  |  |  |  |
| No | 39 (12.7) | 268 (87.3) | Reference |  |
| Yes | 12(16.9) | 59 (83.1) | 1.330 (0.756-2.342) | 0.321 |
| **Energy drinks per week** |  |  |  |  |
| No | 35 (12.8) | 238 (87.2) | Reference |  |
| 1-2 | 11 (16.4) | 56 (83.6) | 1.26(0.726–2.212) | 0.437 |
| 3-7 | 5 (13.2) | 33(86.8) | 0.93 (0.325–2.692) | 0.954 |
| cPR: crude Prevalence Ratio. | | %: Percent | CI: Confidence Interval. | |

Table 7. Bivariate analysis of psychological and biological factors associated with UD among 378 undergraduate health professional students at Makerere University.

| Variable | UD | | |  | Variable |
| --- | --- | --- | --- | --- | --- |
|  | Yes n(%) | | No n(%) | cPR(95% CI) |  |
| **Stress** | |  |  |  |  |
| Low stress | | 5(10.9) | 41 (89.1) | Reference |  |
| Moderate | | 42(13.5) | 269 (86.5) | 1.242 (0.541 -2.853) | 0.608 |
| High stress | | 4(19.1) | 17 (80.9) | 1.752 (0.569- 5.398) | 0.327 |
| **Fatigue** | |  |  |  |  |
| No/Mild | | 28(10.4) | 242 (89.6) | Reference |  |
| Moderate | | 21(22.1) | 74 (77.9) | 2.131 (1.308-3.473) | 0.002 |
| Severe | | 2(15.4) | 11 (84.6) | 1.483 (0.416-5.287) | 0.542 |
| **Body Mass Index** | |  |  |  |  |
| Normal weight | | 20(10.3) | 175 (89.7) | Reference |  |
| Underweight | | 7(17.1) | 34(82.9) | 1.665 (0.783–3.538) | 0.185 |
| Overweight | | 15(16.7) | 75 (83.3) | 1.625 (0.898–2.939) | 0.108 |
| Obese | | 9(17.3) | 43 (82.7) | 1.688 (0.845–3.370) | 0.138 |
